# Supplementary material for: Protocol for WeExPAnd: a prospective, mixed-methods pilot demonstration study to increase access to pre-exposure prophylaxis among women vulnerable to HIV infection in the Southern USA
Source: PubMed Central journal article supplement — BMJ Open. 2023 Jun 7;13(6):e075250. doi: 10.1136/bmjopen-2023-075250 (PMC10255226; doi:10.1136/bmjopen-2023-075250), 2023-06-07
Supplement: bmjopen-2023-075250.reviewer_comments.pdf [file bmjopen-2023-075250.reviewer_comments.pdf]

## PEER REVIEW HISTORY

BMJ Open publishes all reviews undertaken for accepted manuscripts. Reviewers are asked to complete a checklist review form (<http://bmjopen.bmj.com/site/about/resources/checklist.pdf>) and are provided with free text boxes to elaborate on their assessment. These free text comments are reproduced below.

## ARTICLE DETAILS

|                            |                                                                                                                                                                                                                                                         |
|----------------------------|---------------------------------------------------------------------------------------------------------------------------------------------------------------------------------------------------------------------------------------------------------|
| <b>TITLE (PROVISIONAL)</b> | Protocol for WeExPAnd: a prospective, mixed-methods pilot demonstration study to increase access to pre-exposure prophylaxis among women vulnerable to HIV infection in the US South                                                                    |
| <b>AUTHORS</b>             | Psaros, Christina; Goodman, Georgia; McDonald, Victoria; Ott, Corilyn; Blyler, Abigail; Rivas, Alexa; Shan, Liang; Campbell, Marquette; Underwood, Eric; Krakower, Douglas; Elopre, Latesha; Kudroff, Kachina; Sherr, Kenneth H.; Kempf, Mirjam-Colette |

This article was not externally reviewed at BMJ Open. Protocols that have been independently assessed prior to submission to BMJ Open are usually fast-tracked to publication on the grounds that further substantial changes will not be possible. This independent assessment will usually be external, independent review for both a substantial grant award from a non-commercial or government funder and ethics approval.
